# Supplementary material for: Effect of Vitamin D Supplements on Relapse of Digestive Tract Cancer with Tumor Stromal Immune Response: A Secondary Analysis of the AMATERASU Randomized Clinical Trial
Source: MDPI journal article supplement (doi:10.3390/cancers13184708), 2021-09-20
Supplement: s1 [file s1]

## Supplementary Online Content

### Effect of Vitamin D Supplements on Relapse of Digestive Tract Cancer with Tumor Stromal Immune Response: A Secondary Analysis of the AMATERASU Randomized Clinical Trial

Authors: Taisuke Akutsu, MD, PhD; Kazuki Kanno, MD; Shinya Okada, MD, PhD; Hironori Ohdaira, MD, PhD; Yutaka Suzuki, MD, PhD; and Mitsuyoshi Urashima, MD, MPH, PhD

**Figure S1.** Patient flowchart through the present post hoc analysis --- page 2

**Figure S2.** Image analysis of CD3+, CD4+, CD8+, CD45RO+, and CD56+ cells in digestive tract cancers --- page 3

**Table S1.** Associations among the densities of CD3+, CD4+, CD8+, CD45RO+, and CD56+ tumor-infiltrating lymphocytes --- page 4

**Figure S3.** Scatter plots and associations among the densities of CD3+, CD4+, CD8+, CD45RO+, and CD56+ in tumor stroma --- page 5

**Table S2.** Patients' characteristics in subgroups stratified by infiltration of immune cells in tumor stroma --- page 6 - 10

**Table S3.** Patients' characteristics stratified by vitamin D vs. placebo --- page 11 - 13

**Figure S4.** Subdistribution hazard ratios of relapse according to higher and lower halves of each subset for tumor-infiltrating lymphocytes in the vitamin D group compared with the placebo group --- page 14

**Figure S5.** Hazard ratios of death according to higher and lower halves of each subset for tumor-infiltrating lymphocytes in the vitamin D group compared with the placebo group --- page 15

**Figure S6.** Hazard ratios of death according to the higher and lower halves of each subset for tumor-infiltrating lymphocytes in the vitamin D group compared with the placebo group --- page 16

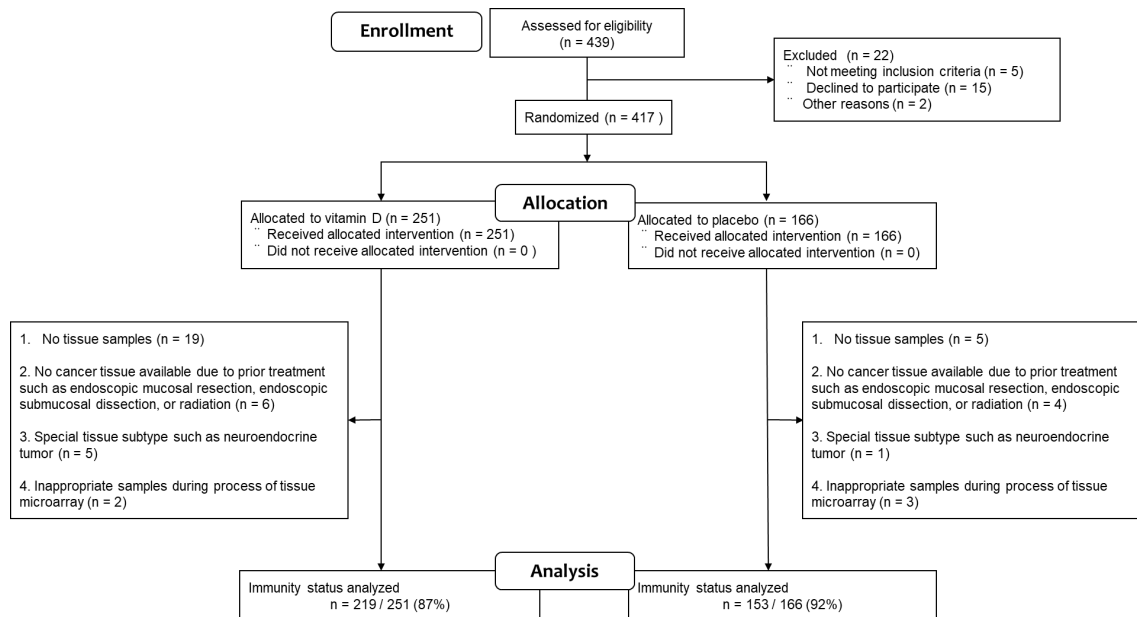

**Figure S1. Patient flowchart through the present post hoc analysis**

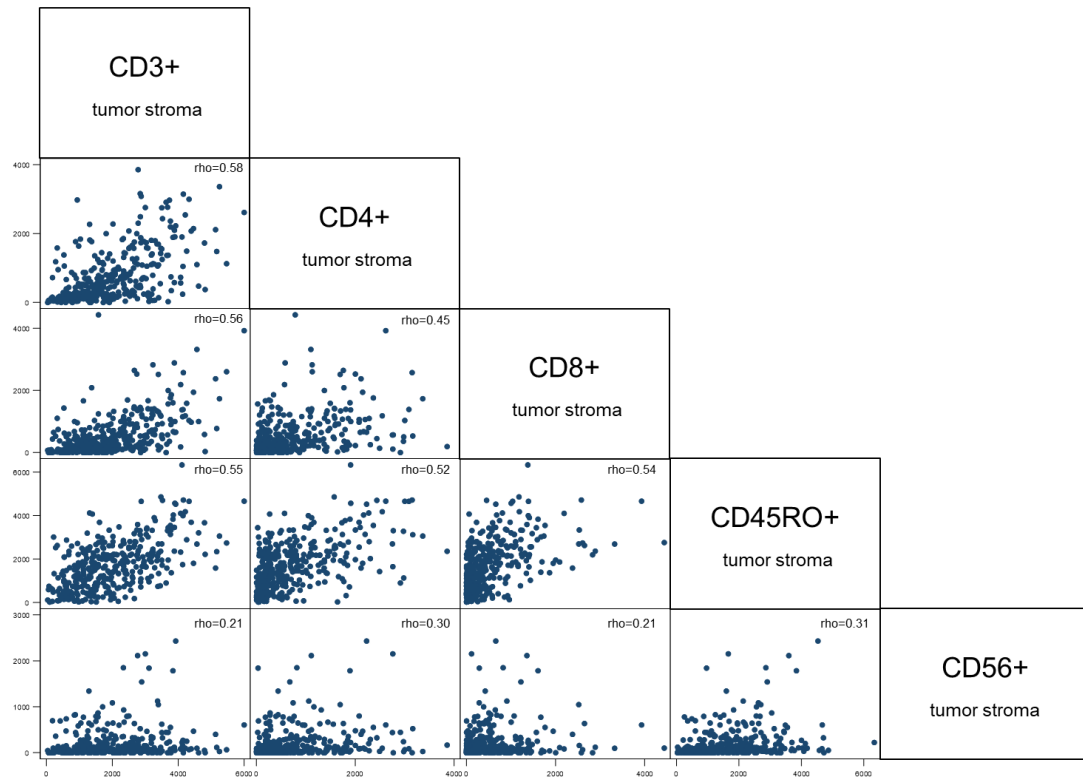

**Figure S2. Scatter plots and associations among the densities of CD3+, CD4+, CD8+, CD45RO+, and CD56+ in tumor stroma**

Spearman's rank correlation coefficient ( $\rho$ ) is used to quantify the strength of associations of each density of CD3+, CD4+, CD8+, CD45RO+, and CD56+ cells in tumor stroma. CD3+, 4+, 8+, and 45RO+ cells are moderately related to each other, whereas CD56+ cells have a weak association with other subsets.

**Table S1. Associations among the densities of CD3+, CD4+, CD8+, CD45RO+, and CD56+ tumor-infiltrating lymphocytes**

|            | CD3+ TIL   | CD4+ TIL   | CD8+ TIL   | CD45RO+TIL | CD56+ TIL |
|------------|------------|------------|------------|------------|-----------|
| CD3+ TIL   | -          |            |            |            |           |
| CD4+ TIL   | rho = 0.43 | -          |            |            |           |
| CD8+ TIL   | rho = 0.60 | rho = 0.35 | -          |            |           |
| CD45RO+TIL | rho = 0.39 | rho = 0.21 | rho = 0.33 | -          |           |
| CD56+ TIL  | rho = 0.13 | rho = 0.16 | n. s.      | n. s.      | -         |

\* Spearman's rank correlation coefficient (rho) was used to quantify the strengths of associations between two continuous variables:  $\rho \geq 0.9$ , very strong;  $0.9 > \rho \geq 0.7$ , strong;  $0.7 > \rho \geq 0.4$ , moderate;  $0.4 > \rho \geq 0.1$ , weak; and  $\rho < 0.1$ , negligible. n. s. not significant

The distribution of the density of each lymphocytic infiltrate subset (median [interquartile range] number/mm<sup>2</sup>) was as follows: CD3+ 364 [143–727], CD4+ 104 [182–1070], CD8+ 125 [34–339], CD45RO+ 551 [222–1098], and CD56+ 40 [0–91]. There were moderate associations between CD3+ and CD4+ cells and between CD3+ and CD8+ cells. In contrast, other combinations had weak or no significant associations with other subsets.

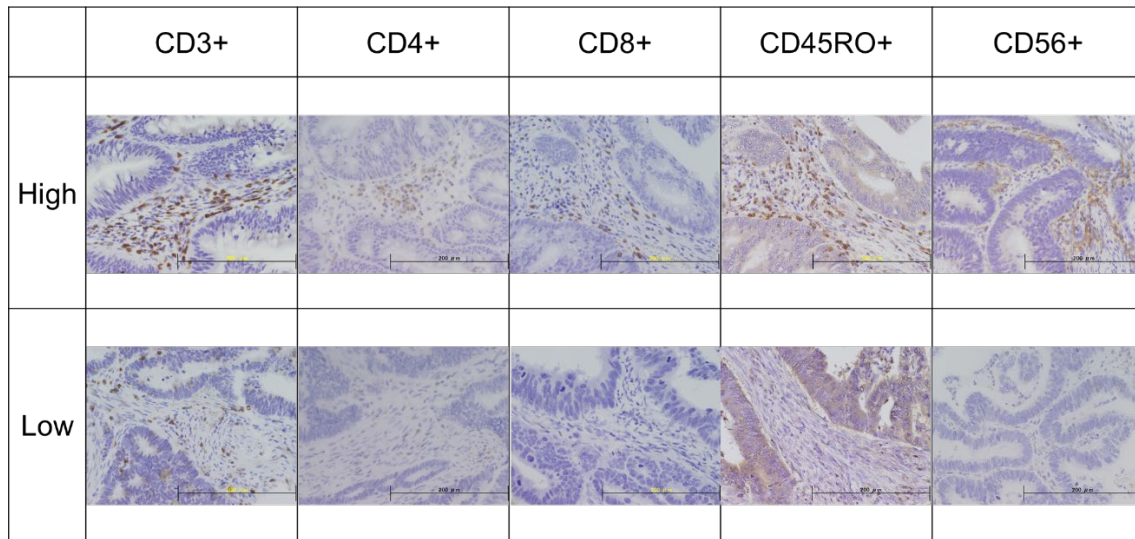

**Figure S3. Typical images of CD3+, CD4+, CD8+, CD45RO+, and CD56+ cells**

CD3+, CD4, CD8+, CD45RO+, and CD56+ cells in digestive tract cancers. Upper panels show high-density cases representing the higher-half subgroups, and lower panels show the low-cell density cases representing the lower-half subgroups. The distribution of the density of each lymphocytic infiltrate subset (median [interquartile range] number/mm<sup>2</sup>) is as follows: CD3+ 1747 [1095-2731], CD4+ 467 [182-1070], CD8+ 305 [93-723], CD45RO+ 1606 [783-2355], and CD56+ 70 [28-208].

**Table S2. Patients' characteristics in subgroups stratified by infiltration of immune cells in tumor stroma**

|                                                    |                          | CD3       |           | CD4       |           | CD8       |           | CD45RO    |           | CD56      |           |
|----------------------------------------------------|--------------------------|-----------|-----------|-----------|-----------|-----------|-----------|-----------|-----------|-----------|-----------|
|                                                    |                          | High      | Low       |
|                                                    |                          | N=186     |
| Intervention                                       |                          |           |           |           |           |           |           |           |           |           |           |
|                                                    | Vitamin D, No. (%)       | 115 (62)  | 104 (56)  | 117 (63)  | 102 (55)  | 115 (62)  | 104 (56)  | 113 (61)  | 106 (57)  | 108 (58)  | 111 (60)  |
|                                                    | Placebo, No. (%)         | 71 (38)   | 82 (44)   | 69 (37)   | 84 (45)   | 71 (38)   | 82 (44)   | 73 (39)   | 80 (43)   | 78 (42)   | 75(40)    |
| 25(OH)D <sup>b</sup> , No. (%) <sup>a</sup>        |                          | N=182     | N=184     | N=182     | N=184     | N=181     | N=185     | N=182     | N=184     | N=183     | N=183     |
|                                                    | Very low: <10 ng/mL      | 7 (4)     | 10 (5)    | 7 (4)     | 10 (5)    | 9 (5)     | 8 (4)     | 7 (4)     | 10 (5)    | 10 (5)    | 7 (4)     |
|                                                    | Low: ≥ 10 and < 20 ng/mL | 64 (35)   | 71 (39)   | 67 (37)   | 68 (37)   | 65 (36)   | 70 (38)   | 67 (37)   | 68 (37)   | 57 (31)   | 78 (43)   |
|                                                    | High: ≥ 20 ng/mL         | 116 (61)  | 103 (56)  | 108 (59)  | 106 (58)  | 107 (59)  | 107 (58)  | 108 (59)  | 106 (58)  | 116 (63)  | 98 (54)   |
| 25(OH)D <sup>b</sup> , ng/mL                       |                          | N=182     | N=184     | N=182     | N=184     | N=181     | N=185     | N=182     | N=184     | N=183     | N=183     |
|                                                    | median                   | 22        | 21        | 21        | 22        | 21        | 21        | 21        | 21        | 22        | 21        |
|                                                    | IQR (25%-75%)            | (16-27)   | (16-27)   | (15-27)   | (16-27)   | (15-27)   | (16-27)   | (16-27)   | (16-27)   | (16-28)   | (15-26)   |
| Bioavailable 25(OH)D <sup>b</sup> , ng/mL, No. (%) |                          | N=155     | N=160     | N=157     | N=158     | N=154     | N=161     | N=157     | N=158     | N=158     | N=157     |
|                                                    | Low: < median            | 76 (49)   | 80 (50)   | 87 (55)   | 69 (44)   | 78 (51)   | 78 (48)   | 82 (52)   | 74 (47)   | 76 (48)   | 80 (51)   |
|                                                    | High: ≥ median           | 79 (51)   | 80 (50)   | 70 (45)   | 89 (56)   | 76 (49)   | 83 (52)   | 75 (48)   | 84 (53)   | 82 (52)   | 77 (49)   |
| Bioavailable 25(OH)D <sup>b</sup> , ng/mL          |                          | N=155     | N=160     | N=157     | N=158     | N=154     | N=161     | N=157     | N=158     | N=158     | N=157     |
|                                                    | median                   | 1.8       | 1.7       | 1.6       | 1.9       | 1.7       | 1.7       | 1.6       | 1.8       | 1.8       | 1.7       |
|                                                    | IQR (25%-75%)            | (1.2-2.6) | (1.3-2.5) | (1.2-2.3) | (1.2-2.8) | (1.2-2.6) | (1.2-2.6) | (1.2-2.4) | (1.3-2.6) | (1.3-2.7) | (1.2-2.5) |
| Sex, No. (%)                                       |                          |           |           |           |           |           |           |           |           |           |           |
|                                                    | Male                     | 125 (67)  | 123 (66)  | 130 (70)  | 118 (63)  | 124 (67)  | 124 (67)  | 120 (65)  | 128 (69)  | 125 (67)  | 123 (66)  |

|                                                             |                                 |         |         |         |         |         |         |         |         |         |         |
|-------------------------------------------------------------|---------------------------------|---------|---------|---------|---------|---------|---------|---------|---------|---------|---------|
|                                                             | Female                          | 61 (33) | 63 (34) | 56 (30) | 68 (37) | 62 (33) | 62 (33) | 66 (35) | 58 (31) | 61 (33) | 63 (34) |
| Age quartile, No. (%) <sup>a</sup>                          |                                 |         |         |         |         |         |         |         |         |         |         |
|                                                             | Q1, 35-59 y                     | 47 (25) | 40 (22) | 40 (22) | 47 (25) | 43 (23) | 44 (24) | 39 (21) | 48 (26) | 45 (24) | 42 (23) |
|                                                             | Q2, 60-65 y                     | 40 (22) | 43 (23) | 42 (23) | 41 (22) | 43 (23) | 40 (22) | 41 (22) | 42 (23) | 44 (24) | 39 (21) |
|                                                             | Q3, 66-73 y                     | 46 (25) | 56 (30) | 56 (30) | 46 (25) | 51 (27) | 51 (27) | 55 (30) | 47 (25) | 51 (27) | 51 (27) |
|                                                             | Q4, 74-90 y                     | 53 (28) | 47 (25) | 48 (26) | 52 (28) | 49 (26) | 51 (27) | 51 (27) | 49 (26) | 46 (25) | 54 (29) |
| Body mass index <sup>c</sup> quartile, No. (%) <sup>a</sup> |                                 |         |         |         |         |         |         |         |         |         |         |
|                                                             | Q1, 15.0-19.7 kg/m <sup>2</sup> | 46 (25) | 45 (24) | 35 (19) | 56 (30) | 42 (23) | 49 (26) | 43 (24) | 48 (26) | 37 (20) | 54 (29) |
|                                                             | Q2, 19.8-21.8 kg/m <sup>2</sup> | 49 (26) | 42 (23) | 49 (26) | 42 (23) | 52 (28) | 39 (21) | 50 (27) | 41 (22) | 45 (24) | 46 (25) |
|                                                             | Q3, 21.9-23.7 kg/m <sup>2</sup> | 42 (23) | 53 (29) | 46 (25) | 49 (26) | 45 (24) | 50 (27) | 47 (25) | 48 (26) | 48 (26) | 47 (26) |
|                                                             | Q4, 23.8-37.3 kg/m <sup>2</sup> | 48 (26) | 45 (24) | 55 (30) | 38 (21) | 46 (25) | 47 (25) | 45 (24) | 48 (26) | 56 (30) | 37 (20) |
| History of other cancers, No. (%)                           |                                 | 6 (3)   | 7 (4)   | 6 (3)   | 7 (4)   | 6 (3)   | 7 (4)   | 7 (4)   | 6 (3)   | 8 (4)   | 5 (3)   |
| <sup>a</sup>                                                |                                 |         |         |         |         |         |         |         |         |         |         |
| Comorbid condition, No. (%) <sup>a</sup>                    |                                 |         |         |         |         |         |         |         |         |         |         |
|                                                             | Hypertension                    | 62 (33) | 80 (43) | 66 (35) | 76 (41) | 66 (35) | 76 (41) | 71 (38) | 71 (38) | 73 (39) | 69 (37) |
|                                                             | Diabetes mellitus               | 29 (16) | 34 (18) | 35 (19) | 28 (15) | 35 (19) | 28 (15) | 35 (19) | 28 (15) | 36 (19) | 27 (15) |
|                                                             | Endocrine disease               | 23 (12) | 26 (14) | 25 (13) | 24 (13) | 24 (13) | 25 (13) | 22 (12) | 27 (15) | 29 (16) | 20 (11) |
|                                                             | Cardiovascular disease          | 12 (6)  | 14 (8)  | 12 (6)  | 14 (8)  | 16 (9)  | 10 (5)  | 12 (6)  | 14 (8)  | 15 (8)  | 11 (6)  |
|                                                             | Chronic kidney disease          | 2 (1)   | 3 (2)   | 1 (0.5) | 4 (2)   | 2 (1)   | 3 (2)   | 1 (0.5) | 4 (2)   | 0 (0)   | 5 (3)   |
|                                                             | Asthma                          | 2 (1)   | 1 (0.5) | 2 (1)   | 1 (0.5) | 1 (0.5) | 2 (1)   | 1 (0.5) | 2 (1)   | 1 (0.5) | 2 (1)   |
|                                                             | Orthopedic disease              | 0 (0)   | 2 (1)   | 0 (0)   | 2 (1)   | 1 (0.5) | 1 (0.5) | 2 (1)   | 0 (0)   | 0 (0)   | 2 (1)   |
| Site of cancer, No. (%) <sup>a</sup>                        |                                 |         |         |         |         |         |         |         |         |         |         |
|                                                             | Esophagus                       | 13 (7)  | 21 (11) | 12 (6)  | 22 (12) | 12 (6)  | 22 (12) | 14 (8)  | 20 (11) | 5 (3)   | 29 (16) |

|                                        |                                   |          |         |          |         |          |          |         |          |          |         |
|----------------------------------------|-----------------------------------|----------|---------|----------|---------|----------|----------|---------|----------|----------|---------|
| Stage, No. (%) <sup>a</sup>            | Stomach                           | 73 (39)  | 86 (46) | 77 (41)  | 82 (44) | 90 (48)  | 69 (37)  | 90 (48) | 69 (37)  | 94 (51)  | 65 (35) |
|                                        | Small bowel                       | 1 (0.5)  | 1 (0.5) | 2 (1)    | 0 (0)   | 2 (1)    | 0 (0)    | 2 (1)   | 0 (0)    | 2 (1)    | 0 (0)   |
|                                        | Colorectal                        | 99 (53)  | 78 (42) | 95 (51)  | 82 (44) | 82 (44)  | 95 (51)  | 80 (43) | 97 (52)  | 85 (46)  | 92 (49) |
|                                        |                                   |          |         |          |         |          |          |         |          |          |         |
| Pathology, No. (%) <sup>d,e</sup>      | I                                 | 89 (48)  | 71 (38) | 89 (48)  | 71 (38) | 88 (47)  | 72 (39)  | 92 (49) | 68 (27)  | 103 (55) | 57 (31) |
|                                        | II                                | 46 (25)  | 55 (30) | 46 (25)  | 55 (30) | 46 (25)  | 55 (30)  | 51 (27) | 50 (27)  | 44 (24)  | 57 (31) |
|                                        | III                               | 51 (27)  | 60 (32) | 51 (27)  | 60 (32) | 52 (28)  | 59 (32)  | 43 (23) | 68 (37)  | 39 (21)  | 72 (39) |
|                                        |                                   |          |         |          |         |          |          |         |          |          |         |
| P53 expression, No. (%) <sup>a,f</sup> | Adenocarcinoma                    |          |         |          |         |          |          |         |          |          |         |
|                                        | Well-differentiated               | 111 (60) | 92 (49) | 110 (59) | 93 (50) | 101 (54) | 102 (55) | 99 (53) | 104 (56) | 108 (58) | 95 (51) |
|                                        | Moderately differentiated         | 82 (44)  | 76 (41) | 71 (38)  | 87 (47) | 88 (47)  | 70 (38)  | 80 (43) | 78 (42)  | 75 (40)  | 83 (45) |
|                                        | Poorly differentiated             | 34 (18)  | 37 (20) | 32 (17)  | 39 (21) | 41 (22)  | 30 (16)  | 45 (24) | 26 (14)  | 40 (22)  | 31 (17) |
|                                        | Signet ring cell                  | 10 (5)   | 31 (17) | 14 (8)   | 27 (15) | 20 (11)  | 21 (11)  | 24 (13) | 17 (9)   | 29 (16)  | 12 (6)  |
|                                        | Mucinous                          | 12 (6)   | 14 (8)  | 13 (7)   | 13 (7)  | 15 (8)   | 11 (6)   | 14 (8)  | 12 (6)   | 12 (6)   | 14 (8)  |
|                                        | Papillary                         | 8 (4)    | 7 (4)   | 6 (3)    | 9 (5)   | 5 (3)    | 10 (5)   | 6 (3)   | 9 (5)    | 7 (4)    | 8 (4)   |
|                                        | Squamous cell carcinoma           | 12 (6)   | 16 (9)  | 10 (5)   | 18 (10) | 11 (6)   | 17 (9)   | 13 (7)  | 15 (8)   | 5 (3)    | 24 (12) |
| Vitamin D receptor expression, N       | None                              | 24 (13)  | 45 (24) | 28 (15)  | 41 (22) | 29 (16)  | 40 (22)  | 31 (17) | 38 (20)  | 32 (17)  | 37 (20) |
|                                        | Faintly expressed: > 0% & < 10%   | 42 (23)  | 35 (19) | 37 (20)  | 40 (22) | 44 (24)  | 33 (18)  | 40 (22) | 37 (20)  | 43 (23)  | 34 (18) |
|                                        | Strongly expressed: ≥ 10% & < 50% | 31 (17)  | 27 (15) | 37 (20)  | 21 (11) | 33 (18)  | 25 (13)  | 38 (20) | 20 (11)  | 30 (16)  | 28 (15) |
|                                        | Overexpressed: ≥ 50% <sup>g</sup> | 89 (48)  | 79 (42) | 84 (45)  | 84 (45) | 80 (43)  | 88 (47)  | 77 (41) | 91 (49)  | 81 (44)  | 87 (47) |



o. (%) <sup>a g</sup>

|        |                             |                 |           |          |          |           |          |           |           |          |
|--------|-----------------------------|-----------------|-----------|----------|----------|-----------|----------|-----------|-----------|----------|
| Q1,    | <b>40 (22) <sup>i</sup></b> | <b>55 (30)</b>  | 44 (24)   | 51 (27)  | 54 (29)  | 41 (22)   | 56 (30)  | 39 (21)   | 42 (23)   | 53 (28)  |
| Q2,    | <b>41 (22)</b>              | <b>54 (29)</b>  | 43 (23)   | 52 (28)  | 46 (26)  | 49 (26)   | 45 (24)  | 50 (27)   | 43 (23)   | 52 (28)  |
| Q3,    | <b>50 (27)</b>              | <b>42 (23)</b>  | 49 (26)   | 43 (23)  | 44 (24)  | 48 (26)   | 43 (23)  | 49 (26)   | 53 (28)   | 39 (21)  |
| Q4,    | <b>55 (30)</b>              | <b>35 (19)</b>  | 50 (27)   | 40 (22)  | 42 (23)  | 48 (26)   | 42 (23)  | 48 (26)   | 48 (26)   | 42 (23)  |
| Median | <b>208 <sup>i</sup></b>     | <b>159</b>      | 195       | 167      | 171      | 189       | 165      | 189       | 195       | 165      |
| (IQR)  | <b>(115-285)</b>            | <b>(90-245)</b> | (110-280) | (90-260) | (90-265) | (111-274) | (90-265) | (110-275) | (110-274) | (90-265) |

Ki-67 expression, No. (%) <sup>a h</sup>

|              |                                |                   |                                |                   |         |         |         |         |         |         |
|--------------|--------------------------------|-------------------|--------------------------------|-------------------|---------|---------|---------|---------|---------|---------|
| Q1,          | <b>19 (10) <sup>k</sup></b>    | <b>45 (24)</b>    | <b>22 (12) <sup>l</sup></b>    | <b>42 (23)</b>    | 31 (17) | 33 (18) | 24 (13) | 40 (22) | 27 (15) | 37 (20) |
| Q2,          | <b>52 (28)</b>                 | <b>67 (36)</b>    | <b>62 (33)</b>                 | <b>57 (31)</b>    | 57 (31) | 62 (33) | 62 (33) | 57 (31) | 58 (31) | 61 (33) |
| Q3,          | <b>32 (17)</b>                 | <b>30 (16)</b>    | <b>32 (17)</b>                 | <b>30 (16)</b>    | 34 (18) | 28 (15) | 36 (19) | 26 (14) | 31 (17) | 31 (17) |
| Q4,          | <b>83 (45)</b>                 | <b>44 (24)</b>    | <b>70 (38)</b>                 | <b>57 (31)</b>    | 64 (34) | 63 (34) | 64 (34) | 63 (34) | 70 (38) | 57 (31) |
| Median (IQR) | <b>60 (50-70) <sup>m</sup></b> | <b>50 (40-60)</b> | <b>60 (49-70) <sup>n</sup></b> | <b>50 (40-70)</b> |         |         |         |         |         |         |

|                                             |                             |                |         |         |         |         |                            |                |         |         |
|---------------------------------------------|-----------------------------|----------------|---------|---------|---------|---------|----------------------------|----------------|---------|---------|
| Adjuvant chemotherapy, No. (%) <sup>a</sup> | <b>54 (29) <sup>o</sup></b> | <b>77 (41)</b> | 61 (33) | 70 (38) | 60 (32) | 71 (38) | <b>52 (28)<sup>m</sup></b> | <b>79 (42)</b> | 57 (31) | 74 (40) |
|---------------------------------------------|-----------------------------|----------------|---------|---------|---------|---------|----------------------------|----------------|---------|---------|

<sup>a</sup> Percentages may not sum to 100% because of rounding.

<sup>b</sup> Not measured in some patients.

<sup>c</sup> Not measured in some patients. Calculated as weight in kilograms divided by height in meters squared.

<sup>d</sup> Since many patients had multiple histopathological components, histopathological subgroups were not mutually exclusive of each other.

<sup>e</sup> Histopathological subtypes were not mutually exclusive, since there could be multiple subtypes.

<sup>f</sup> p53-positive was defined as a positive nuclear percentage in the tumor epithelium greater than 10%.

<sup>g</sup> VDR was defined as a score using a semiquantitative scoring system, and Ki-67 as a positive nuclear staining percentage in the tumor epithelium.

<sup>h</sup> Bioavailable 25(OH)D was calculated using serum concentrations of 25(OH)D, vitamin D binding protein (DBP), albumin, and a combination of DBP single-nucleotide polymorphisms.

<sup>i</sup> Chi-squared test:  $P = .026$ .

<sup>j</sup> Mann–Whitney test:  $P = .0025$ .

<sup>k</sup> Chi-squared test:  $P < .001$ .

<sup>l</sup> Chi-squared test:  $P = .049$ .

<sup>m</sup> Mann–Whitney test:  $P < .0001$ .

<sup>n</sup> Mann–Whitney test:  $P = .001$ .

<sup>o</sup> Chi-squared test:  $P = .001$ .

**Table S3. Patients' characteristics stratified by vitamin D vs. placebo**

|                                        | <b>Vitamin D</b> | <b>Placebo</b> |
|----------------------------------------|------------------|----------------|
| <b>N=372</b>                           | <b>N=219</b>     | <b>N=153</b>   |
| <b>25(OH)D, n (%)</b>                  | N=216            | N=150          |
| <b>Low: &lt;20 ng/mL</b>               | 87 (40)          | 65 (43)        |
| <b>Middle: ≥ 20 and ≤ 40 ng/mL</b>     | 125 (58)         | 84 (56)        |
| <b>High: &gt; 40 ng/mL</b>             | 4 (2)            | 1 (0.7)        |
| <b>25(OH)D, ng/mL</b>                  | N=216            | N=150          |
| <b>Median</b>                          | 22               | 21             |
| <b>IQR (25%-75%)</b>                   | (17-27)          | (14-26)        |
| <b>Bioavailable 25(OH)D, ng/mL</b>     | N=187            | N=128          |
| <b>Low: &lt; median</b>                | 84 (45)          | 72 (56)        |
| <b>High: ≥ median</b>                  | 103 (55)         | 56 (44)        |
| <b>Bioavailable 25(OH)D, ng/mL</b>     | N=187            | N=128          |
| <b>Median</b>                          | 1.9              | 1.6            |
| <b>IQR (25%-75%)</b>                   | (1.3-2.8)        | (1.1-2.3)      |
| <b>Sex, n (%)</b>                      |                  |                |
| <b>Male</b>                            | 152 (69)         | 96 (63)        |
| <b>Female</b>                          | 67 (31)          | 57 (37)        |
| <b>Age quartile, n (%)</b>             |                  |                |
| <b>Q1, 35-59 y</b>                     | 43 (20)          | 44 (29)        |
| <b>Q2, 60-65 y</b>                     | 45 (21)          | 38 (25)        |
| <b>Q3, 66-73 y</b>                     | 57 (26)          | 45 (29)        |
| <b>Q4, 74-90 y</b>                     | 74 (34)          | 26 (17)        |
| <b>Body mass index quartile, n (%)</b> |                  |                |
| <b>Q1, 15.0-19.7 kg/m<sup>2</sup></b>  | 57 (26)          | 34 (22)        |
| <b>Q2, 19.8-21.8 kg/m<sup>2</sup></b>  | 53 (24)          | 38 (25)        |
| <b>Q3, 21.9-23.7 kg/m<sup>2</sup></b>  | 53 (24)          | 42 (27)        |
| <b>Q4, 23.8-37.3 kg/m<sup>2</sup></b>  | 54 (25)          | 39 (25)        |
| <b>History of other cancers, n (%)</b> | 7 (3)            | 6 (4)          |
| <b>Comorbid condition, n (%)</b>       |                  |                |
| <b>Hypertension</b>                    | 89 (41)          | 53 (35)        |
| <b>Diabetes mellitus</b>               | 39 (18)          | 24 (16)        |
| <b>Endocrine disease</b>               | 31 (14)          | 18 (12)        |

|                                      |          |         |
|--------------------------------------|----------|---------|
| Cardiovascular disease               | 17 (8)   | 9 (6)   |
| Chronic kidney disease               | 4 (2)    | 1 (0.7) |
| Asthma                               | 3 (1)    | 0 (0)   |
| Orthopedic disease                   | 1 (0.5)  | 1 (0.7) |
| Site of cancer, n (%)                |          |         |
| Esophagus                            | 20 (9)   | 14 (9)  |
| Stomach                              | 92 (42)  | 67 (44) |
| Small bowel                          | 1 (0.5)  | 1 (0.7) |
| Colorectal                           | 106 (48) | 71 (46) |
| Stage, n (%)                         |          |         |
| I                                    | 100 (46) | 60 (39) |
| II                                   | 55 (25)  | 46 (30) |
| III                                  | 64 (29)  | 47 (31) |
| Pathology                            |          |         |
| Adenocarcinoma, n (%)                |          |         |
| Well-differentiated                  | 126 (58) | 77 (50) |
| Moderately differentiated            | 90 (41)  | 68 (44) |
| Poorly differentiated                | 38 (17)  | 33 (22) |
| Signet ring cell                     | 17 (8)   | 24 (16) |
| Mucinous                             | 18 (8)   | 8 (5)   |
| Papillary                            | 10 (5)   | 5 (3)   |
| Squamous cell carcinoma, n (%)       | 17 (8)   | 11 (7)  |
| P53 expression, n (%)                |          |         |
| None                                 | 36 (16)  | 33 (22) |
| Faintly expressed: > 0% & < 10%      | 44 (20)  | 33 (22) |
| Strongly expressed: ≥ 10% & < 50%    | 31 (14)  | 27 (18) |
| Overexpressed: ≥ 50%                 | 108 (49) | 60 (39) |
| Vitamin D receptor expression, n (%) |          |         |
| Q1,                                  | 60 (27)  | 35 (23) |
| Q2,                                  | 56 (26)  | 39 (25) |
| Q3,                                  | 53 (24)  | 39 (25) |
| Q4,                                  | 50 (23)  | 40 (26) |
| Ki-67 expression, n (%)              |          |         |
| Q1,                                  | 38 (17)  | 26 (17) |
| Q2,                                  | 76 (35)  | 43 (28) |

|                                            |          |         |
|--------------------------------------------|----------|---------|
| Q3,                                        | 32 (15)  | 30 (20) |
| Q4,                                        | 73 (33)  | 54 (35) |
| <b>Infiltration of immune cells, n (%)</b> |          |         |
| CD3+                                       | 115 (53) | 71(46)  |
| CD4+                                       | 117 (53) | 69 (45) |
| CD8+                                       | 115 (53) | 71 (46) |
| CD45RO+                                    | 113 (52) | 73 (48) |
| CD56+                                      | 108 (49) | 78 (51) |
| <b>Adjuvant chemotherapy, n (%)</b>        | 74 (34)  | 57 (37) |

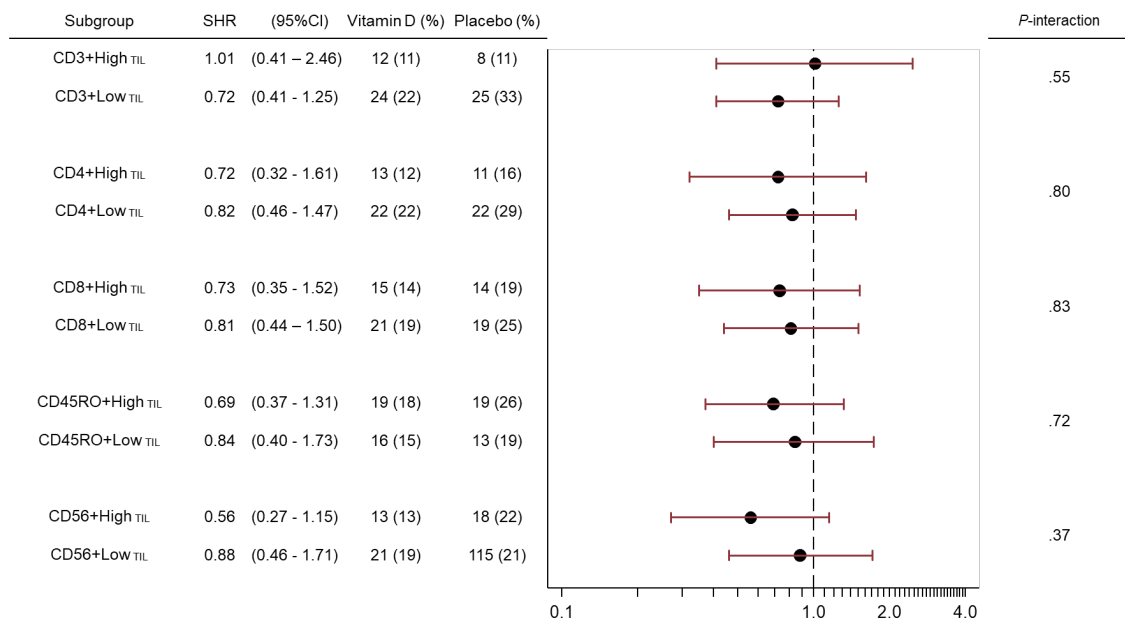

**Figure S4. Subdistribution hazard ratios of relapse according to higher and lower halves of each subset for tumor-infiltrating lymphocytes in the vitamin D group compared with the placebo group**

To evaluate the effects of vitamin D supplementation on relapse as the primary outcome, cumulative incidence functions were applied by considering patient deaths due to causes other than cancer relapse as a competing risk using subdistribution hazard ratios (SHRs) and 95% confidence intervals (CIs). P for interaction was analyzed by two-way interaction tests comparing the higher-half and lower-half subgroups of each subset of tumor-infiltrating lymphocytes (TILs).

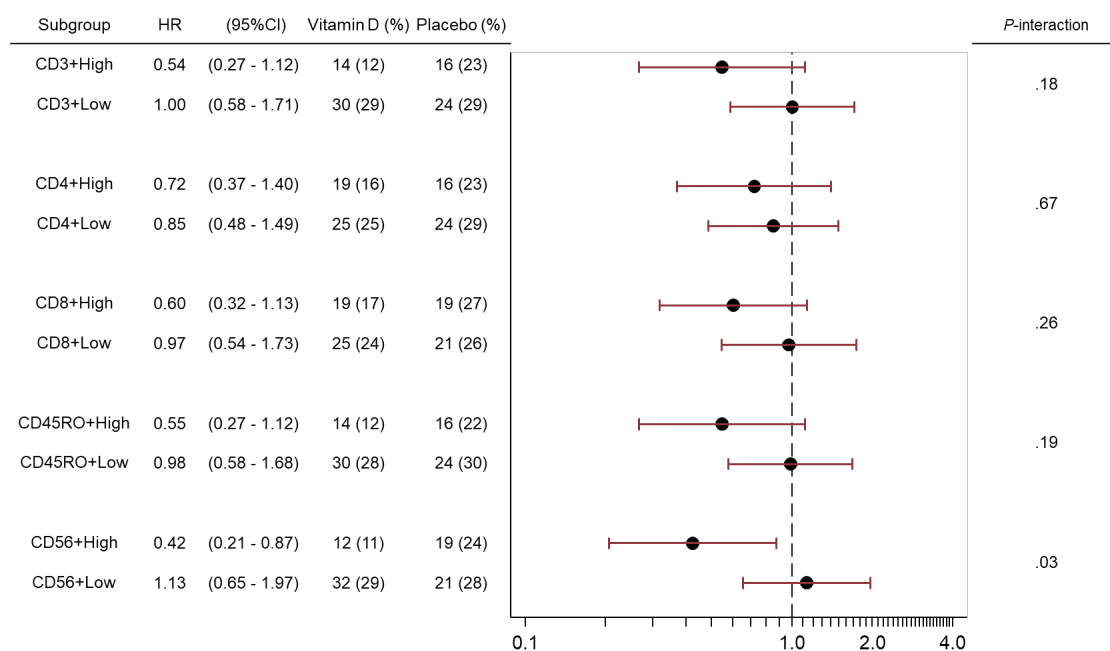

**Figure S5. Hazard ratios of relapse or death according to higher and lower halves of each subset for tumor-infiltrating lymphocytes in the vitamin D group compared with the placebo group**

To evaluate the effects of vitamin D supplementation on relapse or death, a Cox proportional hazards model was used to determine hazard ratios (HRs) and 95% CIs for relapse or death. P for interaction was analyzed by two-way interaction tests comparing the higher-half and lower-half groups of each subset of tumor-infiltrating lymphocytes (TILs).

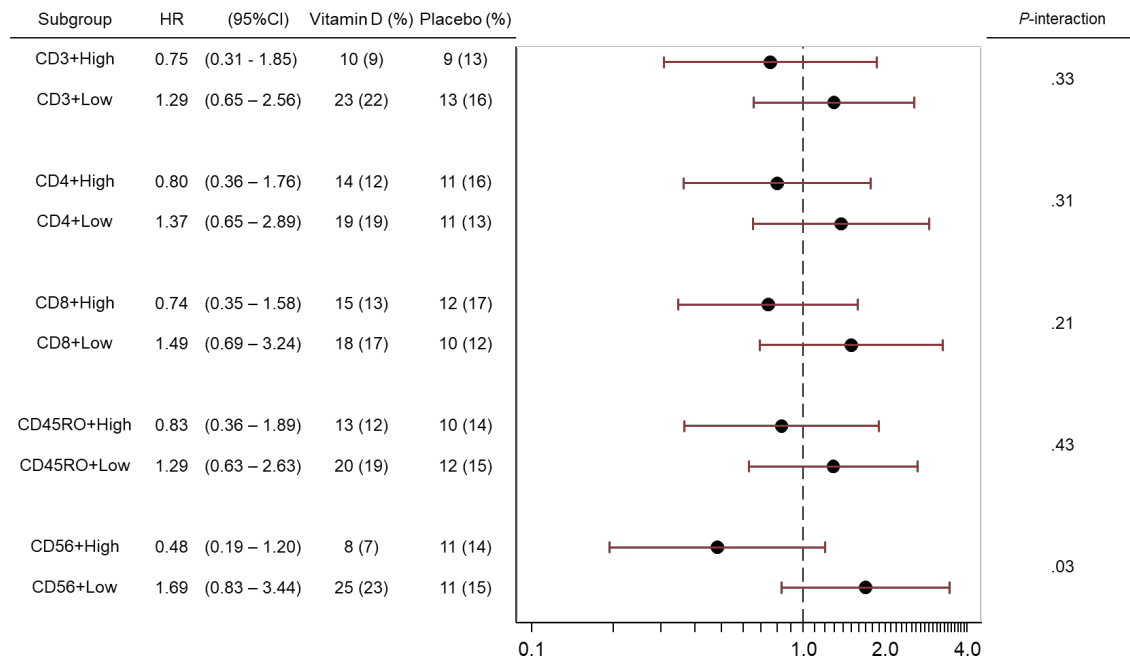

**Figure S6. Hazard ratios of death according to the higher and lower halves of each subset for tumor-infiltrating lymphocytes in the vitamin D group compared with the placebo group**

To evaluate the effects of vitamin D supplementation on death, a Cox proportional hazards model was used to determine hazard ratios (HRs) and 95% CIs for death. P for interaction was analyzed by two-way interaction tests comparing the higher-half and lower-half subgroups of each subset of tumor-infiltrating lymphocytes (TILs).
